# Supplementary material for: Long-term exposure to ambient PM2·5, active commuting, and farming activity and cardiovascular disease risk in adults in China: a prospective cohort study
Source: PubMed Central journal article supplement (PMC10104773; doi:10.1016/s2542-5196(23)00047-5), 2023-04-03
Supplement: mmc1.pdf [file mmc1.pdf]

# THE LANCET

## Planetary Health

### Supplementary appendix

This appendix formed part of the original submission and has been peer reviewed. We post it as supplied by the authors.

Supplement to: Sun D, Liu C, Ding Y, et al. Long-term exposure to ambient PM<sub>2.5</sub>, active commuting, and farming activity and cardiovascular disease risk in adults in China: a prospective cohort study. *Lancet Planet Health* 2023; 7: e304–12.

|    |                                                                                                                      |    |
|----|----------------------------------------------------------------------------------------------------------------------|----|
| 1  | <b>Appendix</b>                                                                                                      |    |
| 2  | <b>Members of the China Kadoorie Biobank collaborative group</b> .....                                               | 3  |
| 3  | <b>eMethods</b> .....                                                                                                | 4  |
| 4  | <b>Questionnaire on physical activity used in the CKB study at baseline</b> .....                                    | 4  |
| 5  | <b>Link to the electronic questionnaires</b> .....                                                                   | 5  |
| 6  | <b>Physical activity types, MET values, codes and intensity categories</b> .....                                     | 6  |
| 7  | <b>Reproducibility of active commuting and farming activity</b> .....                                                | 8  |
| 8  | <b>Description of covariates</b> .....                                                                               | 8  |
| 9  | <b>Case Adjudication</b> .....                                                                                       | 8  |
| 10 | <b>Model adjustment</b> .....                                                                                        | 8  |
| 11 | <b>Model equation</b> .....                                                                                          | 9  |
| 12 | <b>Reference</b> .....                                                                                               | 10 |
| 13 | <b>Table S1. Average yearly PM<sub>2.5</sub> concentrations (µg/m<sup>3</sup>) from 2005 to 2017 among ten study</b> |    |
| 14 | <b>areas</b> .....                                                                                                   | 11 |
| 15 | <b>Figure S1. Geographical locations of 10 study areas and estimated average PM<sub>2.5</sub></b>                    |    |
| 16 | <b>concentrations in China from 2005 to 2017</b> .....                                                               | 12 |
| 17 | <b>Figure S2. Associations of physical activity from active commuting with cerebrovascular</b>                       |    |
| 18 | <b>disease and ischemic heart disease among non-farmers (n=118,274)</b> .....                                        | 13 |
| 19 | <b>Figure S3. Associations of active commuting level categories with cerebrovascular disease and</b>                 |    |
| 20 | <b>ischemic heart disease among non-farmers stratified according to the median of PM<sub>2.5</sub></b>               |    |
| 21 | <b>concentration (n=118,274)</b> .....                                                                               | 14 |
| 22 | <b>Figure S4. Associations of active commute time with cerebrovascular disease and ischemic</b>                      |    |
| 23 | <b>heart disease among non-farmers stratified according to the median of PM<sub>2.5</sub> concentration</b>          |    |
| 24 | <b>(n=118,274)</b> .....                                                                                             | 15 |
| 25 | <b>Figure S5. Associations of physical activity from active commuting with cerebrovascular</b>                       |    |
| 26 | <b>disease and ischemic heart disease among non-farmers stratified according to the upper tertile</b>                |    |
| 27 | <b>of PM<sub>2.5</sub> concentration (n=118,274)</b> .....                                                           | 16 |
| 28 | <b>Figure S6. Associations of physical activity from active commuting with cerebrovascular</b>                       |    |
| 29 | <b>disease and ischemic heart disease among farmers (n=204,125)</b> .....                                            | 17 |
| 30 | <b>Figure S7. Associations of active commuting level categories with cerebrovascular disease and</b>                 |    |
| 31 | <b>ischemic heart disease among farmers stratified according to the median of PM<sub>2.5</sub></b>                   |    |
| 32 | <b>concentration (n=204,125)</b> .....                                                                               | 18 |
| 33 | <b>Figure S8. Associations of active commute time with cerebrovascular disease and ischemic</b>                      |    |
| 34 | <b>heart disease among farmers stratified according to the median of PM<sub>2.5</sub> concentration</b>              |    |
| 35 | <b>(n=204,125)</b> .....                                                                                             | 19 |
| 36 | <b>Figure S9. Associations of physical activity from active commuting with cerebrovascular</b>                       |    |
| 37 | <b>disease and ischemic heart disease among farmers stratified according to the upper tertile of</b>                 |    |
| 38 | <b>PM<sub>2.5</sub> concentration (n=204,125)</b> .....                                                              | 20 |

39 **Figure S10. Associations of physical activity from farming with cerebrovascular disease and**  
40 **ischemic heart disease among farmers (n=201,140).....21**

41 **Figure S11. Associations of farming activity level categories with cerebrovascular disease and**  
42 **ischemic heart disease among farmers stratified according to the median of PM<sub>2.5</sub>**  
43 **concentration (n=201,140).....22**

44 **Figure S12. Associations of farming time with cerebrovascular disease and ischemic heart**  
45 **disease among farmers stratified according to the median of PM<sub>2.5</sub> concentration (n=201,140).**  
46 **.....23**

47 **Figure S13. Associations of physical activity from farming with cerebrovascular disease and**  
48 **ischemic heart disease among farmers stratified according to the upper tertile of PM<sub>2.5</sub>**  
49 **concentration (n=201,140).....24**

50

51 **Members of the China Kadoorie Biobank collaborative group**

52 **International Steering Committee:** Junshi Chen, Zhengming Chen (PI), Robert  
53 Clarke, Rory Collins, Yu Guo, Liming Li (PI), Jun Lv, Richard Peto, Robin Walters.

54 **International Co-ordinating Centre, Oxford:** Daniel Avery, Derrick Bennett, Ruth  
55 Boxall, Sue Burgess, Ka Hung Chan, Yumei Chang, Yiping Chen, Zhengming Chen,  
56 Johnathan Clarke; Robert Clarke, Huaidong Du, Ahmed Edris Mohamed, Zамmy  
57 Fairhurst-Hunter, Hannah Fry, Simon Gilbert, Alex Hacker, Mike Hill, Michael Holmes,  
58 Pek Kei Im, Andri Iona, Maria Kakkoura, Christiana Kartsonaki, Rene Kerosi, Kuang  
59 Lin, Mohsen Mazidi, Iona Millwood, Sam Morris, Qunhua Nie, Alfred Pozarickij, Paul  
60 Ryder, Saredo Said, Sam Sansome, Dan Schmidt, Paul Sherliker, Rajani Sohoni, Becky  
61 Stevens, Iain Turnbull, Robin Walters, Lin Wang, Neil Wright, Ling Yang, Xiaoming  
62 Yang, Pang Yao.

63 **National Co-ordinating Centre, Beijing:** Yu Guo, Xiao Han, Can Hou, Jun Lv, Pei  
64 Pei, Chao Liu, Canqing Yu, Qingmei Xia. **10 Regional Co-ordinating Centres:**

65 **Qingdao CDC:** Zengchang Pang, Ruqin Gao, Shanpeng Li, Haiping Duan, Shaojie  
66 Wang, Yongmei Liu, Ranran Du, Yajing Zang, Liang Cheng, Xiaocao Tian, Hua  
67 Zhang, Yaoming Zhai, Feng Ning, Xiaohui Sun, Feifei Li. **Licang CDC:** Silu Lv,

68 Junzheng Wang, Wei Hou. **Heilongjiang Provincial CDC:** Wei Sun, Shichun Yan,  
69 Xiaoming Cui. **Nangang CDC:** Chi Wang, Zhenyuan Wu, Yanjie Li, Quan Kang.

70 **Hainan Provincial CDC:** Huiming Luo, Tingting Ou. **Meilan CDC:** Xiangyang

71 Zheng, Zhendong Guo, Shukuan Wu, Yilei Li, Huimei Li. **Jiangsu Provincial CDC:**  
72 Ming Wu, Yonglin Zhou, Jinyi Zhou, Ran Tao, Jie Yang, Jian Su. **Suzhou CDC:** Fang  
73 Liu, Jun Zhang, Yihe Hu, Yan Lu, Liangcai Ma, Aiyu Tang, Shuo Zhang, Jianrong Jin,

74 Jingchao Liu. **Guangxi Provincial CDC:** Mei Lin, Zhenzhen Lu. **Liuzhou CDC:**

75 Lifang Zhou, Changping Xie, Jian Lan, Tingping Zhu, Yun Liu, Liuping Wei, Liyuan  
76 Zhou, Ningyu Chen, Yulu Qin, Sisi Wang. **Sichuan Provincial CDC:** Xianping Wu,

77 Ningmei Zhang, Xiaofang Chen, Xiaoyu Chang. **Pengzhou CDC:** Mingqiang Yuan,  
78 Xia Wu, Xiaofang Chen, Wei Jiang, Jiaqiu Liu, Qiang Sun. **Gansu Provincial CDC:**

79 Faqing Chen, Xiaolan Ren, Caixia Dong. **Maiji CDC:** Hui Zhang, Enke Mao,

80 Xiaoping Wang, Tao Wang, Xi zhang. **Henan Provincial CDC:** Kai Kang, Shixian

81 Feng, Huizi Tian, Lei Fan. **Huixian CDC:** XiaoLin Li, Huarong Sun, Pan He, Xukui  
82 Zhang. **Zhejiang Provincial CDC:** Min Yu, Ruying Hu, Hao Wang. **Tongxiang**

83 **CDC:** Xiaoyi Zhang, Yuan Cao, Kaixu Xie, Lingli Chen, Dun Shen. **Hunan**

84 **Provincial CDC:** Xiaojun Li, Donghui Jin, Li Yin, Huilin Liu, Zhongxi Fu. **Liuyang**

85 **CDC:** Xin Xu, Hao Zhang, Jianwei Chen, Yuan Peng, Libo Zhang, Chan Qu.

86

88 Questionnaire on physical activity used in the CKB study at baseline

89 • Section A: For non-farmers

90 1. In the past 12 months, how active were you at work?

- 91  Mainly sedentary (e.g. office worker)
- 92  Standing occupation (e.g. guard, shop assistant)
- 93  Manual work (e.g. plumber, carpenter)
- 94  Heavy manual work (e.g. miner, construction worker)
- 95  Retired, housewife/husband, unemployed, or disabled → go to Question 12

96 2. In a typical week, about how many hours did you usually work? \_\_\_hours

97 3. In the past 12 months, how did you usually get to work?

- 98  Mainly walk  By bicycle
- 99  By motorbike  By bus/car/ferry/train
- 100  Mainly stayed at home, or work near home → go to Question 12

101 4. How much time did you spend each day on the journey to and from work? \_\_\_mins

103 • Section B: For farmers

104 5. In the past 12 months, did your farming work change seasonally?

- 105  No → go to Question 7
- 106  Yes

107 6. During the farming season in the last 12 months:

- 108 — How many months did it usually last? \_\_\_months
- 109 — What types of work did it usually involve?
- 110  Manual  Semi-mechanized  Fully mechanized
- 111 — How many hours did you usually work each day? \_\_\_hours
- 112 — Of which, how many hours did you sweat or have a much faster heartbeat?
- 113 \_\_\_hours

114 7. In a typical week, how many hours did you usually work in the field? \_\_\_hours

115 8. Apart from the agriculture work, did you have any other job?

- 116  No → go to Question 11
- 117  Yes

118 9. How active were you at work with other job?

- 119  Mainly sedentary  Mainly general manual work
- 120  Mainly standing  Mainly heavy manual work

121 10. In a typical week, about how many hours did you work at other job? \_\_\_hours

122 11. In a typical day how much time did you usually spend on the journey to and from work on  
123 foot or by bicycle? \_\_\_mins

125 • Section C: For both farmers and non-farmers

126 12. During the past 12 months, how often did you exercise in your leisure time?

- 127  Never or almost never
- 128  1-3 times/month } → go to Question 15

- 129       1-2 times/week
- 130       3-5 times/week
- 131       Daily or almost every day
- 132      **13. What is your main type of exercise? (tick one box only)**
- 133       Taichi/Qigong                       Walking
- 134       Jogging/aerobic exercise               Swimming
- 135       Ball games (basketball, table tennis, etc.)  Other (eg. mountain climbing)
- 136      **14. About how many hours per week did you spent on these exercises?**      \_\_\_\_ hours
- 137      **15. In a typical week during the past 12 months, how often did you sweat or have a much faster**
- 138      **heartbeat because of physical activities/exercise?**
- 139       Never or almost never      **} → go to Question 17**
- 140       <1 time/week
- 141       1-2 times/week
- 142       3-5 times/week
- 143       Daily or almost every day
- 144      **16. About how many hours per week did you do such vigorous activities?**      \_\_\_\_ hours
- 145      **17. About how many hours per week did you do housework?**      \_\_\_\_ hour
- 146
- 147      **Link to the electronic questionnaires**
- 148      [https://www.ckbiobank.org/site/binaries/content/assets/resources/pdf/qs\\_baseline-final-](https://www.ckbiobank.org/site/binaries/content/assets/resources/pdf/qs_baseline-final-from10june2004.pdf)
- 149      [from10june2004.pdf](https://www.ckbiobank.org/site/binaries/content/assets/resources/pdf/qs_baseline-final-from10june2004.pdf)

150

**Physical activity types, MET values, codes and intensity categories**

| Activity type                                                               | Intensity | MET | Codes*                                                                                                                                                                                                                                                                                                           |
|-----------------------------------------------------------------------------|-----------|-----|------------------------------------------------------------------------------------------------------------------------------------------------------------------------------------------------------------------------------------------------------------------------------------------------------------------|
| Heavy manual work                                                           | Vigorous  | 6.5 | 11477                                                                                                                                                                                                                                                                                                            |
| Manual work                                                                 | Moderate  | 4.5 | 11476                                                                                                                                                                                                                                                                                                            |
| Standing work                                                               | Moderate  | 3.8 | Mean of 11610 and 11630                                                                                                                                                                                                                                                                                          |
| Sedentary work                                                              | Low       | 1.8 | Mean of 11580, 11585, and 11590                                                                                                                                                                                                                                                                                  |
| Manual work in the farming season                                           | Vigorous  | 6.3 | Mean of 11145 and 11146                                                                                                                                                                                                                                                                                          |
| Semi-mechanized work in the farming season                                  | Moderate  | 3.4 | Mean of 11146 and 11147                                                                                                                                                                                                                                                                                          |
| Fully mechanized work in the farming season                                 | Low       | 2.4 | Mean of 11147 and 11170                                                                                                                                                                                                                                                                                          |
| Work outside the farming season                                             | Low       | 2.0 | 11147                                                                                                                                                                                                                                                                                                            |
| Walking                                                                     | Moderate  | 4.0 | 17270                                                                                                                                                                                                                                                                                                            |
| Bicycle                                                                     | Vigorous  | 6.8 | 1011                                                                                                                                                                                                                                                                                                             |
| Motorbike                                                                   | Moderate  | 3.5 | 16030                                                                                                                                                                                                                                                                                                            |
| Private or public transportation (such as bus, car, underground, and ferry) | Low       | 1.7 | Mean of 16010, 16015, and 16016                                                                                                                                                                                                                                                                                  |
| Household activity                                                          | Low       | 2.8 | Mean of 05030 <sup>†</sup> , 05040 <sup>†</sup> , 05035, 05055, 05070, 05090 <sup>†</sup> , 05092 <sup>†</sup> , 05184, 05197, and 05200                                                                                                                                                                         |
| Tai-Chi/qigong/leisure walking                                              | Moderate  | 3.3 | Mean of 15670 and 17160                                                                                                                                                                                                                                                                                          |
| Jogging/aerobic exercise                                                    | Vigorous  | 7.4 | Mean of 03015, 12020, and 12150                                                                                                                                                                                                                                                                                  |
| Ball games                                                                  | Moderate  | 5.5 | Mean of 15020 <sup>†</sup> , 15030 <sup>†</sup> , 15055, 15080, 15090, 15255, 15605 <sup>†</sup> , 15610 <sup>†</sup> , 15652, 15660, 15675, 15710 <sup>†</sup> , and 15711 <sup>†</sup>                                                                                                                         |
| Brisk walking/gymnastics/folk dancing                                       | Moderate  | 4.2 | Mean of 03025, 15300, and 17200                                                                                                                                                                                                                                                                                  |
| Swimming                                                                    | Vigorous  | 7.2 | Mean of 18230, 18240, and 18310                                                                                                                                                                                                                                                                                  |
| Other exercise, e.g. mountain walking, home exercise and rope jumping       | Moderate  | 5.9 | Mean of 02010, 02064, 04001, 04100, 15110 <sup>†</sup> , 15120 <sup>†</sup> , 15200, 15240, 15310, 15425 <sup>†</sup> , 15430 <sup>†</sup> , 15537, 15550 <sup>‡</sup> , 15551 <sup>‡</sup> , 15552 <sup>‡</sup> , 15580, 15590, 15730, 15732 <sup>‡</sup> , 15733 <sup>‡</sup> , 15734 <sup>‡</sup> , and 19030 |

151 MET, metabolic equivalent of task.

152 \*Based on the 2011 Compendium of Physical Activities: a second update of codes and MET values. Ainsworth BE, et al. *Medicine and Science in Sports and Exercise*,  
 153 2011;43(8):1575-1581.

154 <sup>†</sup>Assigned 1/2 weight in calculating the mean MET value because the connecting two items represent one type of activity.

155 ‡Assigned 1/3 weight in calculating the mean MET value because the connecting three items represent one type of activity.



156 **Reproducibility of active commuting and farming activity**

157 After the baseline survey, about 5% of the participants were randomly selected for the first resurvey in  
158 2008. Reproducibility of the physical activity levels from active commuting and farming activity was  
159 tested in 3,402 participants who worked outside home at baseline and completed the same  
160 questionnaire within two years (median interval=1.7 years). The intraclass correlation coefficients for  
161 physical activity levels from active commuting and farming activity were 0.54 and 0.75, respectively.

162 **Description of covariates**

163 Other covariates collected using the baseline questionnaire included demographic characteristics (sex,  
164 age, educational level, income, and occupation), lifestyle factors (smoking and alcohol drinking status,  
165 consumption of red meat, fresh vegetables and fruits, and leisure sedentary time), pollution from  
166 household fuel combustion (solid fuel use for cooking and heating in the past three houses, and  
167 cookstove ventilation in the baseline house), passive smoking, self-rated health status, personal medical  
168 history, and family histories of diseases.

169 Physical measurements, including height, weight, waist and hip circumferences, and blood pressure,  
170 were conducted by trained staff using calibrated instruments. Body mass index (BMI) was calculated as  
171 weight (kilogram) divided by height (meter) squared. Waist-hip ratio (WHR) was calculated as waist  
172 circumference divided by hip circumference. Prevalent hypertension was defined as having measured  
173 systolic blood pressure $\geq$ 140mmHg, diastolic blood pressure $\geq$ 90mmHg, self-reported diagnosis of  
174 hypertension, or taking antihypertensive drugs. Prevalent diabetes was defined as having random blood  
175 glucose $\geq$ 11.1mmol/L, fasting glucose $\geq$ 7.0mmHg, self-reported diagnosis of diabetes, or taking anti-  
176 diabetic drugs. A family history of heart attack or stroke was defined as at least one of the parents and  
177 siblings with the corresponding disease.

178 **Case Adjudication**

179 As of 2018, medical records of 33,515 IHD cases and 38,823 stroke cases were retrieved and reviewed  
180 by cardiovascular specialists. The diagnosis was confirmed for 87.9% of IHD cases and 91.1% of stroke  
181 cases. <sup>1</sup>

182 **Model adjustment**

183 The model was adjusted for sex, age (years), education (no formal school, primary school, middle  
184 school, or high school or above), household income (<10000, 10000-19999, or  $\geq$ 20000 RMB/y),  
185 occupation (manufacturing workers, managers, professionals, sales or service workers, self-employed,  
186 or others; only adjusted in analyses for non-farmers), seasonal work pattern of farm (have or not have,  
187 only adjusted in farmers), smoking status (non-smokers, former smokers who had stopped for reasons  
188 other than illness, current smokers or former smokers who had stopped because of illness: 1-14, 15-24,  
189 or  $\geq$ 25 cigarettes or equivalent per day), alcohol consumption (less than weekly, former weekly, weekly  
190 but not daily, daily drinking <30, 30-59, or  $\geq$ 60 g/day of pure alcohol), consumption of fresh  
191 vegetables, fresh fruits, and red meat (days per week), leisure sedentary time (hours per day), fuel types  
192 for cooking and heating in baseline house (solid fuels, clean fuels, other fuels, or heating/cooking less  
193 than once a month), cumulative exposure time to solid fuels in the past three houses (years), cookstove  
194 ventilation in the baseline house (have or not have), duration of living with a smoker (years), exposure

195 to secondhand smoke (hours/day), BMI (kg/m<sup>2</sup>), WHR, self-rated health status (excellent, good, fair, or  
196 poor), prevalent hypertension and diabetes (yes or no), family histories of heart disease and stroke  
197 (have or not have), and the remaining part after deducting the active commuting or farming activity  
198 from the total physical activity (MET-h/d).

199

#### 200 **Model equation**

201 We estimated the associations between physical activity and CVD using Cox proportional hazard  
202 models, stratified by the 5-year age groups and 10 study areas. For each participant, the hazard under  
203 this model is

$$204 \quad h(t|x) = h_{0S}(t) \exp(X_1 \beta_1 + C \beta_C)$$

205 where  $h_{0S}(t)$  is the baseline hazard for the stratum  $S$  defined by the 5-year age groups and 10 study  
206 areas,  $X_1$  is active commuting or farming activity,  $C$  are all the covariates, and  $\beta_1$  and  $\beta_C$  are  
207 coefficients for them.

208 In the subgroup analyses, we split the study population (farmers or non-farmers) into two subgroups by  
209 the median (or upper tertile in the sensitivity analysis) of PM<sub>2.5</sub> exposure. We performed the above  
210 stratified Cox models in each subgroup. We used likelihood ratio tests to compare the models with and  
211 without the interaction terms of the PM<sub>2.5</sub> strata and physical activity. The models with and without the  
212 interaction term are

$$213 \quad h(t|x) = h_{0S}(t) \exp(X_1 \beta_1 + X_2 \beta_2 + X_1 X_2 \beta_3 + C \beta_C)$$

$$214 \quad h(t|x) = h_{0S}(t) \exp(X_1 \beta_1 + X_2 \beta_2 + C \beta_C)$$

215 where  $X_2$  is the PM<sub>2.5</sub> strata, and  $X_1 X_2$  is the interaction term of the PM<sub>2.5</sub> strata and active commuting  
216 or farming activity.

217 **Reference**

- 218 1. Turnbull I, Clarke R, Wright N, et al. Diagnostic accuracy of major stroke types in Chinese  
219 adults: A clinical adjudication study involving 40,000 stroke cases. *Lancet Reg Health West Pac* 2022;  
220 **21**: 100415.  
221

222

**Table S1. Average yearly PM<sub>2.5</sub> concentrations (µg/m<sup>3</sup>) from 2005 to 2017 among ten study areas**

|         | Urban areas |          |          |          |          | Rural areas |          |          |          |          |
|---------|-------------|----------|----------|----------|----------|-------------|----------|----------|----------|----------|
|         | Qingdao     | Harbin   | Haikou   | Suzhou   | Liuzhou  | Sichuan     | Gansu    | Henan    | Zhejiang | Hunan    |
| Mean±SD | 57.1±1.0    | 55.3±1.3 | 26.2±0.4 | 57.4±1.7 | 45.3±0.9 | 51.4±4.0    | 39.0±2.0 | 70.8±1.4 | 53.5±1.1 | 51.2±1.7 |
| P25     | 56.2        | 54.3     | 26.0     | 56.1     | 45.0     | 48.8        | 37.8     | 70.0     | 52.3     | 50.2     |
| P50     | 57.2        | 55.5     | 26.3     | 58.0     | 45.4     | 51.9        | 39.1     | 70.7     | 53.5     | 51.2     |
| P75     | 57.8        | 56.6     | 26.4     | 58.7     | 45.8     | 54.3        | 40.2     | 71.4     | 54.4     | 52.9     |

223

SD, standard derivation; P25, 25<sup>th</sup> percentile; P50, 50<sup>th</sup> percentile; P75, 75<sup>th</sup> percentile.

224

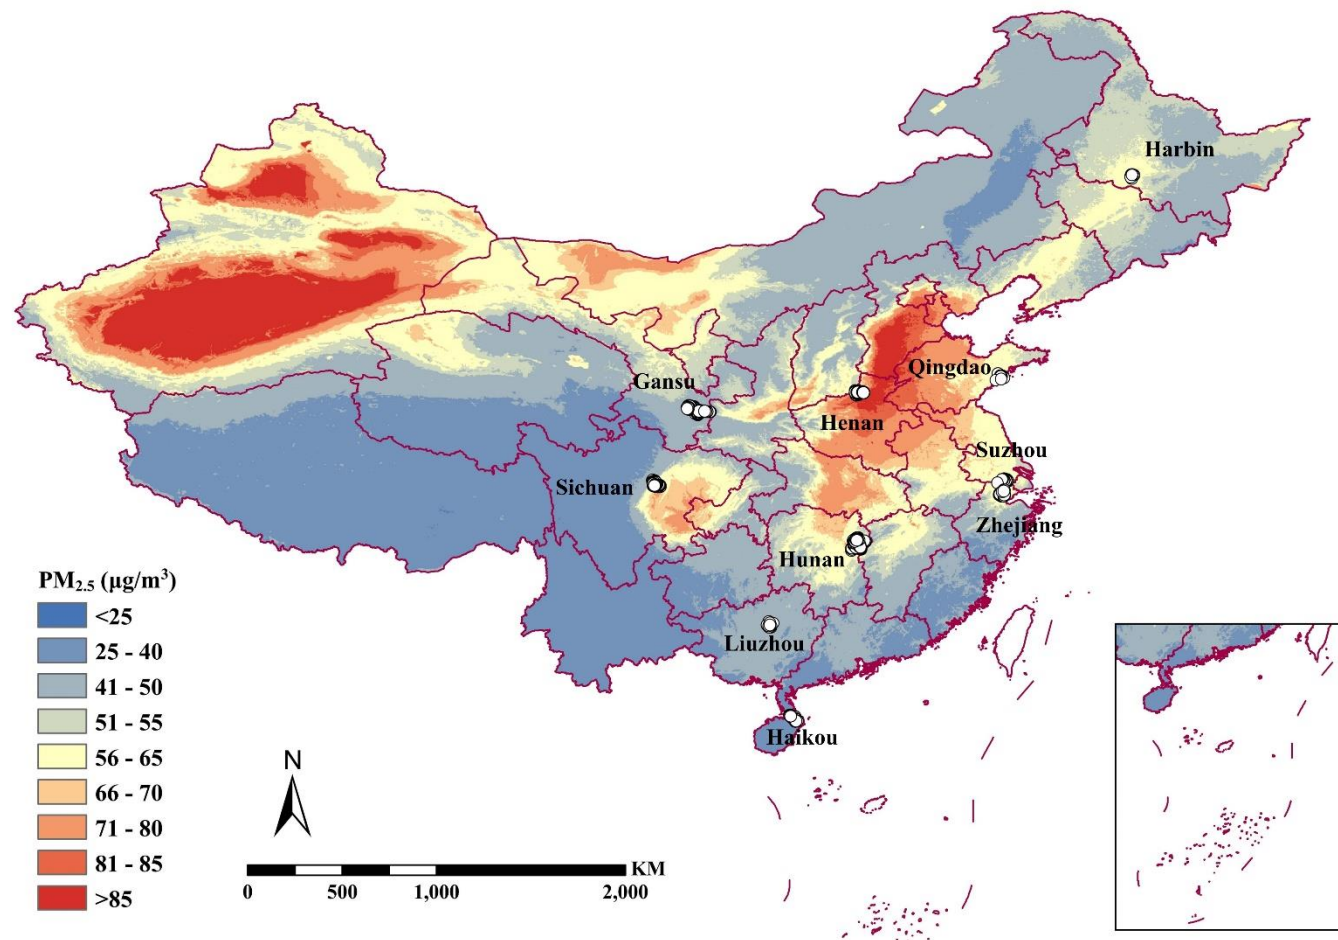

225

226 Figure S1. Geographical locations of 10 study areas and estimated average PM<sub>2.5</sub> concentrations in China from 2005 to 2017

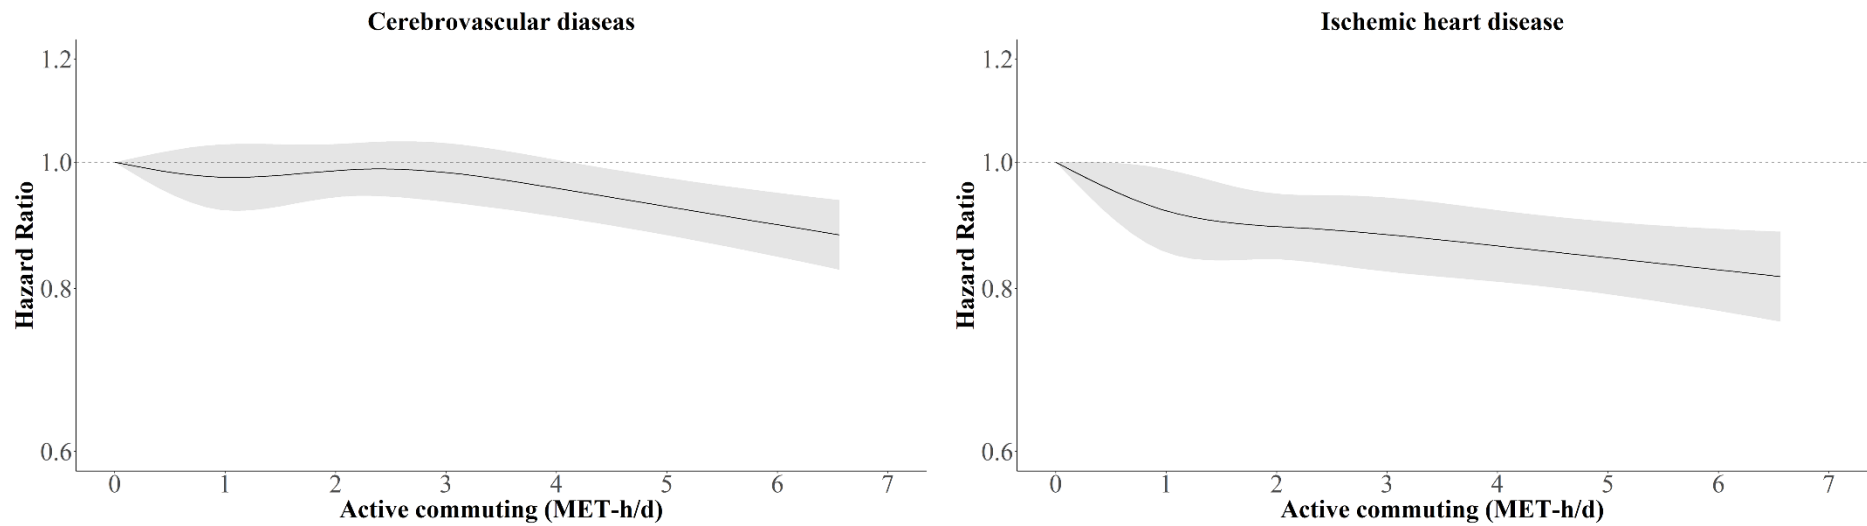

227

228 **Figure S2. Associations of physical activity from active commuting with cerebrovascular disease and ischemic heart disease among non-farmers (n=118,274).**

229 MET, metabolic equivalent of task. Solid lines represent hazard ratios and the ribbons represent 95% confidence intervals from Cox proportional hazard models with  
 230 restricted cubic splines. Curves within the 95<sup>th</sup> percentile of active commuting level were shown.

231 The models were adjusted for sex, age (years), education, household income, occupation, smoking status, alcohol consumption, consumption of fresh vegetables, fresh fruits,  
 232 and red meat (days per week), leisure sedentary time (hours per day), fuel types for cooking and heating in baseline house, cumulative exposure time to solid fuels in the past  
 233 three houses (years), cookstove ventilation in the baseline house, duration of living with a smoker (years), exposure to secondhand smoke (hours/day), BMI (kg/m<sup>2</sup>), WHR,  
 234 self-rated health status, prevalent hypertension and diabetes, family histories of heart disease and stroke, and the remaining part after deducting the active commuting from  
 235 the total physical activity (MET-h/d).

### Cerebrovascular disease

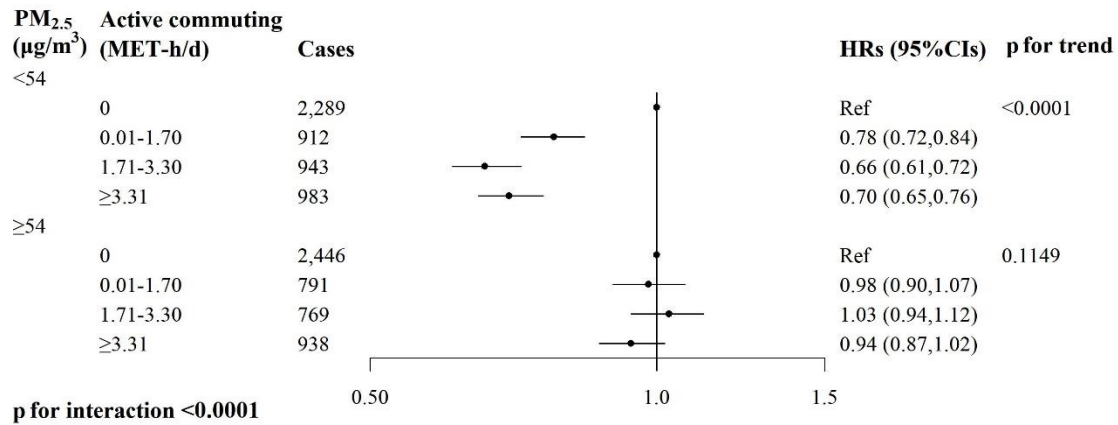

236

### Ischemic heart disease

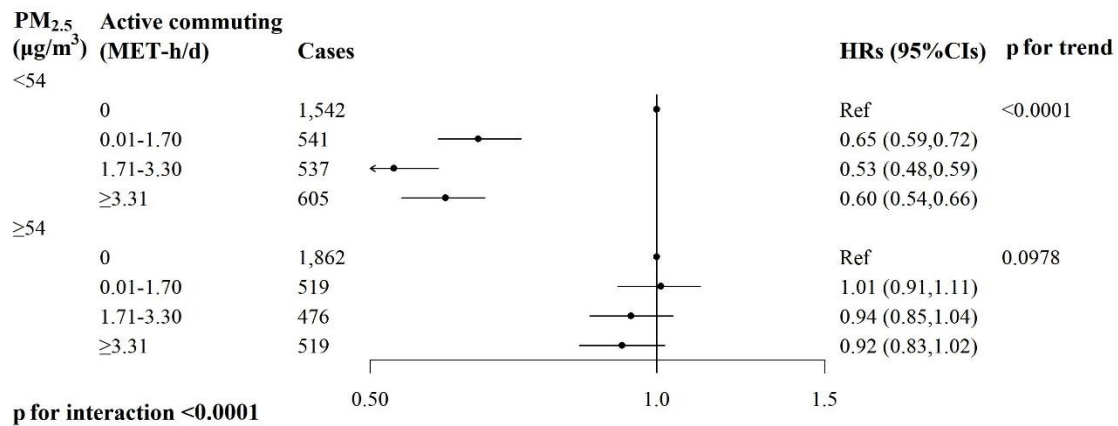

237

238 **Figure S3. Associations of active commuting level categories with cerebrovascular disease and**  
 239 **ischemic heart disease among non-farmers stratified according to the median of PM<sub>2.5</sub>**  
 240 **concentration (n=118,274).**

241 MET, metabolic equivalent of task.

242 The models were adjusted for sex, age (years), education, household income, occupation, smoking  
 243 status, alcohol consumption, consumption of fresh vegetables, fresh fruits, and red meat (days per  
 244 week), leisure sedentary time (hours per day), fuel types for cooking and heating in baseline house,  
 245 cumulative exposure time to solid fuels in the past three houses (years), cookstove ventilation in the  
 246 baseline house, duration of living with a smoker (years), exposure to secondhand smoke (hours/day),  
 247 BMI (kg/m<sup>2</sup>), WHR, self-rated health status, prevalent hypertension and diabetes, family histories of  
 248 heart disease and stroke, and the remaining part after deducting the active commuting from the total  
 249 physical activity (MET-h/d).

250

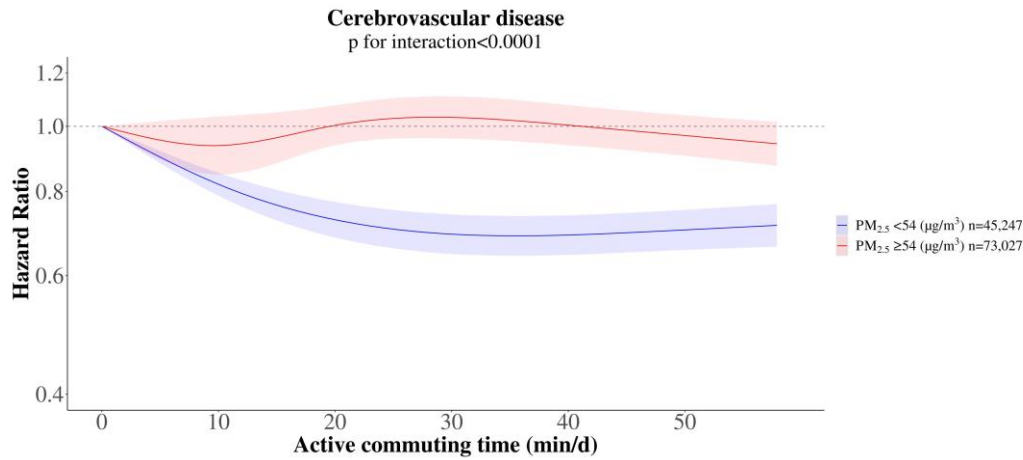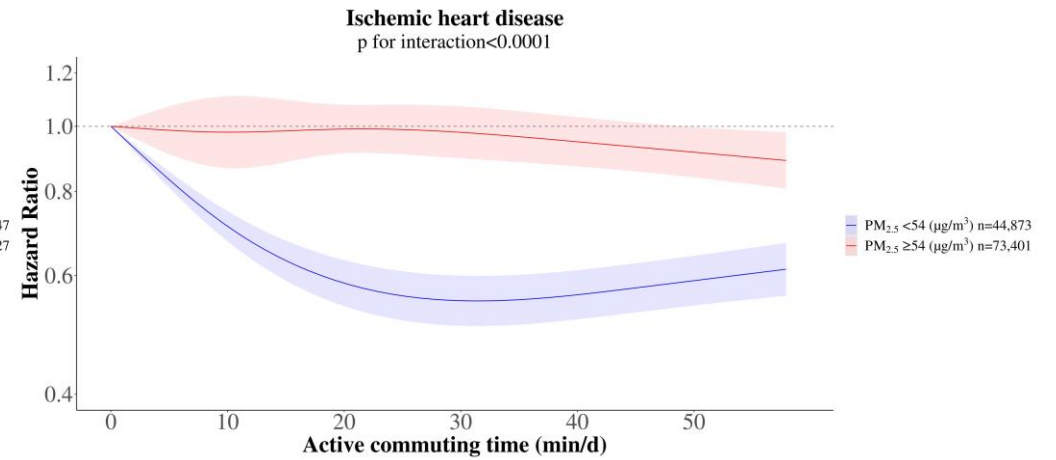

251

252

253

254

255

256

257

258

259

**Figure S4. Associations of active commute time with cerebrovascular disease and ischemic heart disease among non-farmers stratified according to the median of PM<sub>2.5</sub> concentration (n=118,274).**

MET, metabolic equivalent of task. Solid lines represent hazard ratios and the ribbons represent 95% confidence intervals from Cox proportional hazard models with restricted cubic splines.

Curves within the 95<sup>th</sup> percentile of active commuting time in each stratum were shown.

The models were adjusted for sex, age (years), education, household income, occupation, smoking status, alcohol consumption, consumption of fresh vegetables, fresh fruits, and red meat (days per week), leisure sedentary time (hours per day), fuel types for cooking and heating in baseline house, cumulative exposure time to solid fuels in the past three houses (years), cookstove ventilation in the baseline house, duration of living with a smoker (years), exposure to secondhand smoke (hours/day), BMI (kg/m<sup>2</sup>), WHR, self-rated health status, prevalent hypertension and diabetes, family histories of heart disease and stroke, and the remaining part after deducting the active commuting from the total physical activity (MET-h/d).



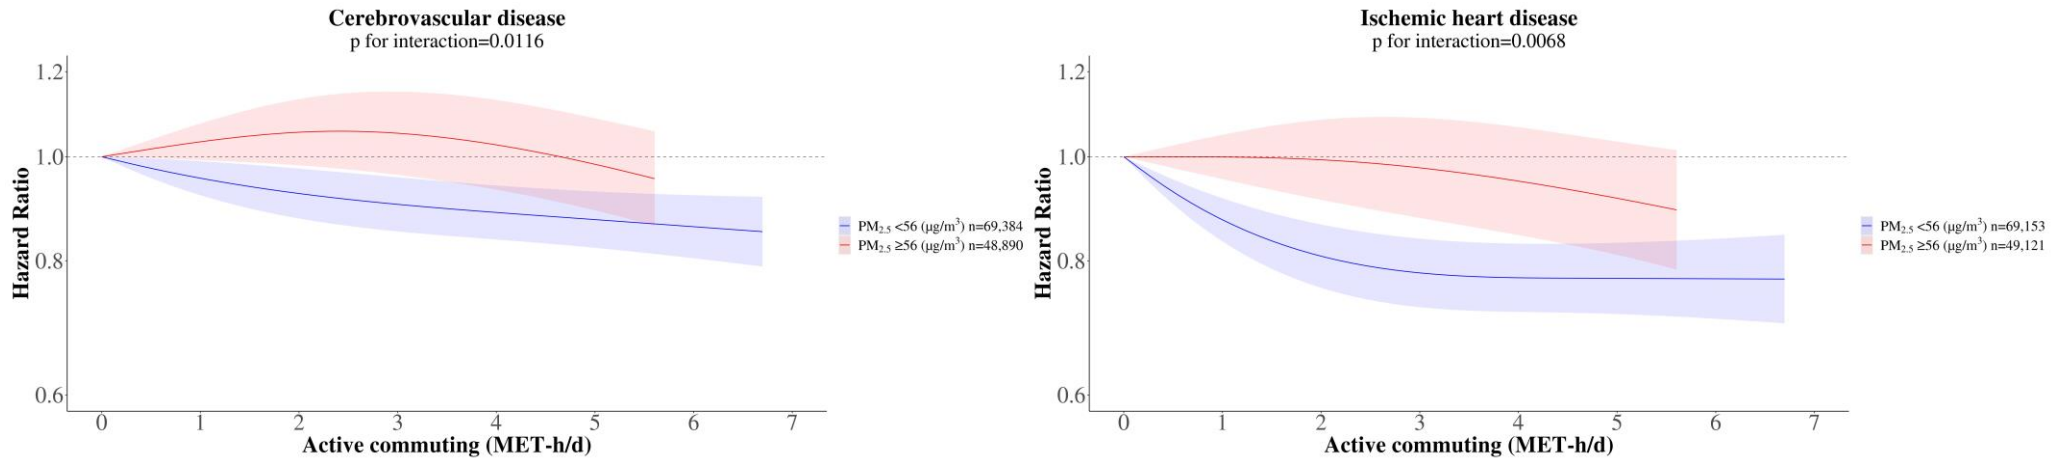

260

261 **Figure S5. Associations of physical activity from active commuting with cerebrovascular disease and ischemic heart disease among non-farmers stratified according to the upper**  
 262 **tertile of PM<sub>2.5</sub> concentration (n=118,274).**

263 MET, metabolic equivalent of task. Solid lines represent hazard ratios and the ribbons represent 95% confidence intervals from Cox proportional hazard models with restricted cubic splines.

264 Curves within the 95<sup>th</sup> percentile of active commuting level in each stratum were shown.

265 The models were adjusted for sex, age (years), education, household income, occupation, smoking status, alcohol consumption, consumption of fresh vegetables, fresh fruits, and red meat  
 266 (days per week), leisure sedentary time (hours per day), fuel types for cooking and heating in baseline house, cumulative exposure time to solid fuels in the past three houses (years), cookstove  
 267 ventilation in the baseline house, duration of living with a smoker (years), exposure to secondhand smoke (hours/day), BMI (kg/m<sup>2</sup>), WHR, self-rated health status, prevalent hypertension and  
 268 diabetes, family histories of heart disease and stroke, and the remaining part after deducting the active commuting from the total physical activity (MET-h/d).

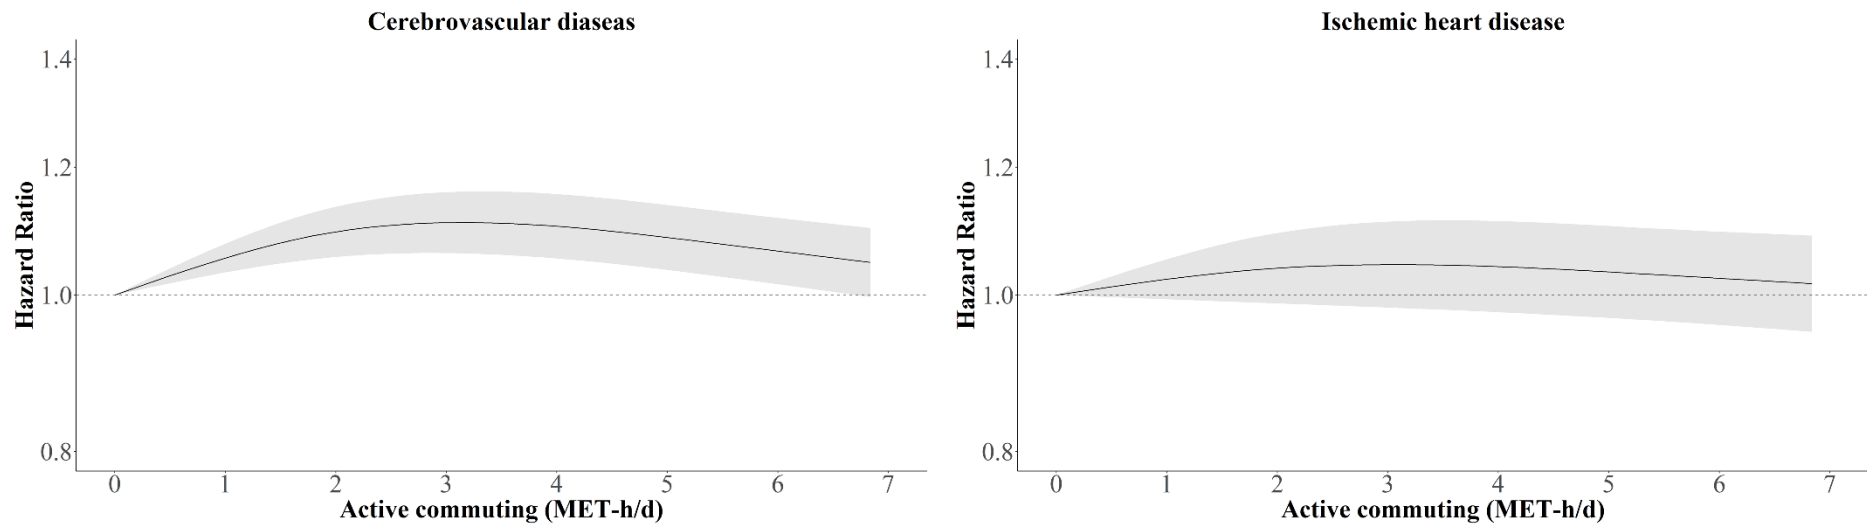

269

270 **Figure S6. Associations of physical activity from active commuting with cerebrovascular disease and ischemic heart disease among farmers (n=204,125).**

271 MET, metabolic equivalent of task. Solid lines represent hazard ratios and the ribbons represent 95% confidence intervals from Cox proportional hazard models with  
 272 restricted cubic splines. Curves within the 95<sup>th</sup> percentile of active commuting level were shown.

273 The models were adjusted for sex, age (years), education, household income, seasonal work pattern of farm, smoking status, alcohol consumption, consumption of fresh  
 274 vegetables, fresh fruits, and red meat (days per week), leisure sedentary time (hours per day), fuel types for cooking and heating in baseline house, cumulative exposure time  
 275 to solid fuels in the past three houses (years), cookstove ventilation in the baseline house, duration of living with a smoker (years), exposure to secondhand smoke  
 276 (hours/day), BMI (kg/m<sup>2</sup>), WHR, self-rated health status, prevalent hypertension and diabetes, family histories of heart disease and stroke, and the remaining part after  
 277 deducting the active commuting from the total physical activity (MET-h/d).

### Cerebrovascular disease

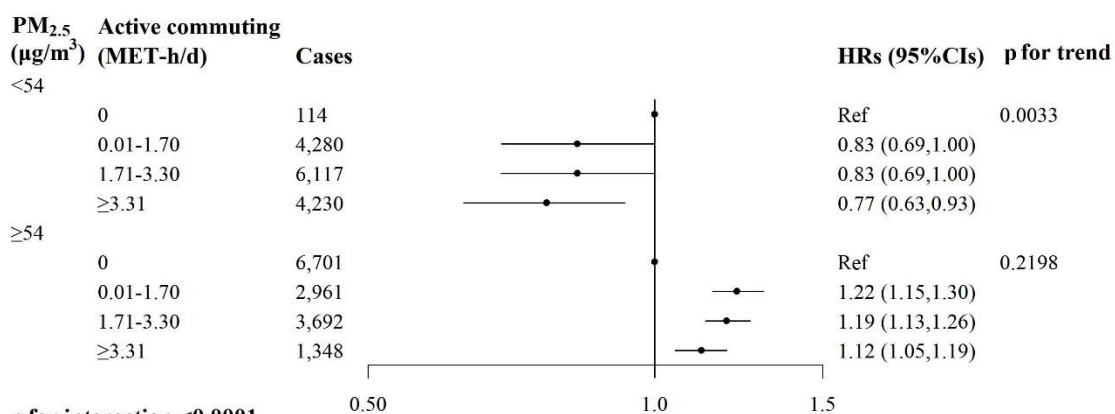

p for interaction <0.0001

278

### Ischemic heart disease

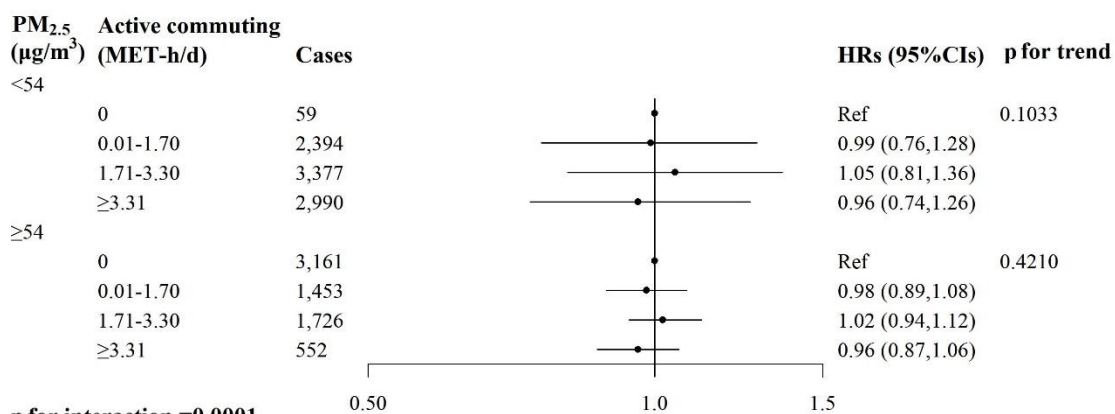

p for interaction =0.0001

279

280 **Figure S7. Associations of active commuting level categories with cerebrovascular disease and**  
 281 **ischemic heart disease among farmers stratified according to the median of PM<sub>2.5</sub> concentration**  
 282 **(n=204,125).**

283 MET, metabolic equivalent of task.

284 The models were adjusted for sex, age (years), education, household income, seasonal work pattern of  
 285 farm, smoking status, alcohol consumption, consumption of fresh vegetables, fresh fruits, and red meat  
 286 (days per week), leisure sedentary time (hours per day), fuel types for cooking and heating in baseline  
 287 house, cumulative exposure time to solid fuels in the past three houses (years), cookstove ventilation in  
 288 the baseline house, duration of living with a smoker (years), exposure to secondhand smoke  
 289 (hours/day), BMI (kg/m<sup>2</sup>), WHR, self-rated health status, prevalent hypertension and diabetes, family  
 290 histories of heart disease and stroke, and the remaining part after deducting the active commuting from  
 291 the total physical activity (MET-h/d).

292

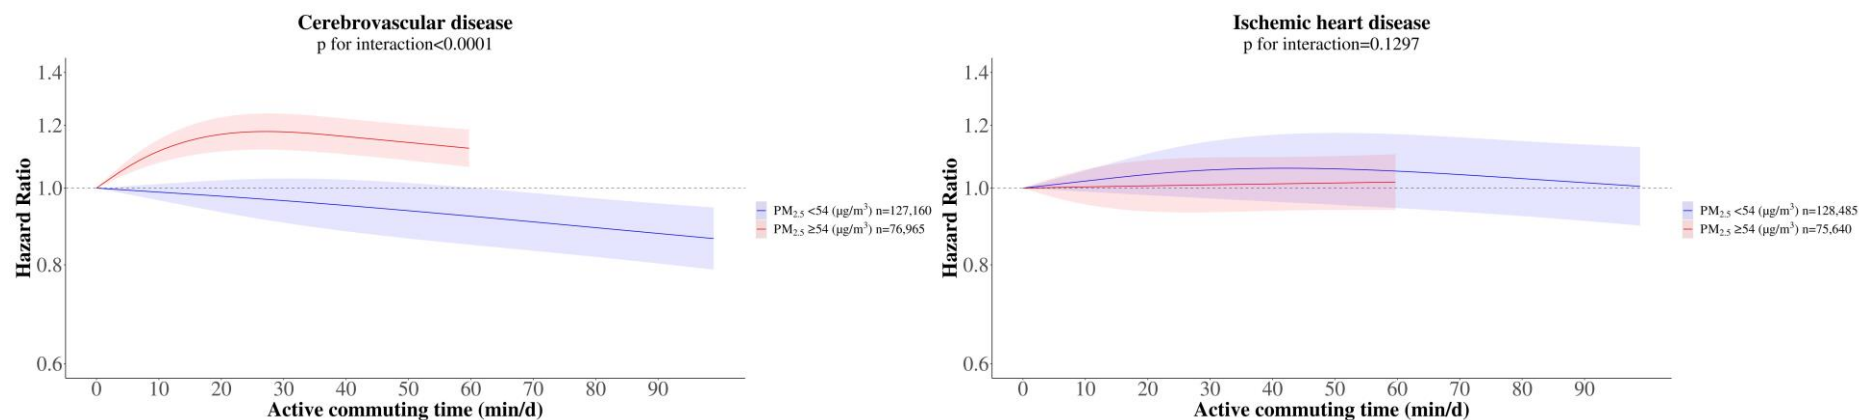

293

294 **Figure S8. Associations of active commute time with cerebrovascular disease and ischemic heart disease among farmers stratified according to the median of PM<sub>2.5</sub>**  
 295 **concentration (n=204,125).**

296 MET, metabolic equivalent of task. Solid lines represent hazard ratios and the ribbons represent 95% confidence intervals from Cox proportional hazard models with  
 297 restricted cubic splines. Curves within the 95<sup>th</sup> percentile of active commuting time in each stratum were shown.

298 The models were adjusted for sex, age (years), education, household income, seasonal work pattern of farm, smoking status, alcohol consumption, consumption of fresh  
 299 vegetables, fresh fruits, and red meat (days per week), leisure sedentary time (hours per day), fuel types for cooking and heating in baseline house, cumulative exposure time  
 300 to solid fuels in the past three houses (years), cookstove ventilation in the baseline house, duration of living with a smoker (years), exposure to secondhand smoke  
 301 (hours/day), BMI (kg/m<sup>2</sup>), WHR, self-rated health status, prevalent hypertension and diabetes, family histories of heart disease and stroke, and the remaining part after  
 302 deducting the active commuting from the total physical activity (MET-h/d).

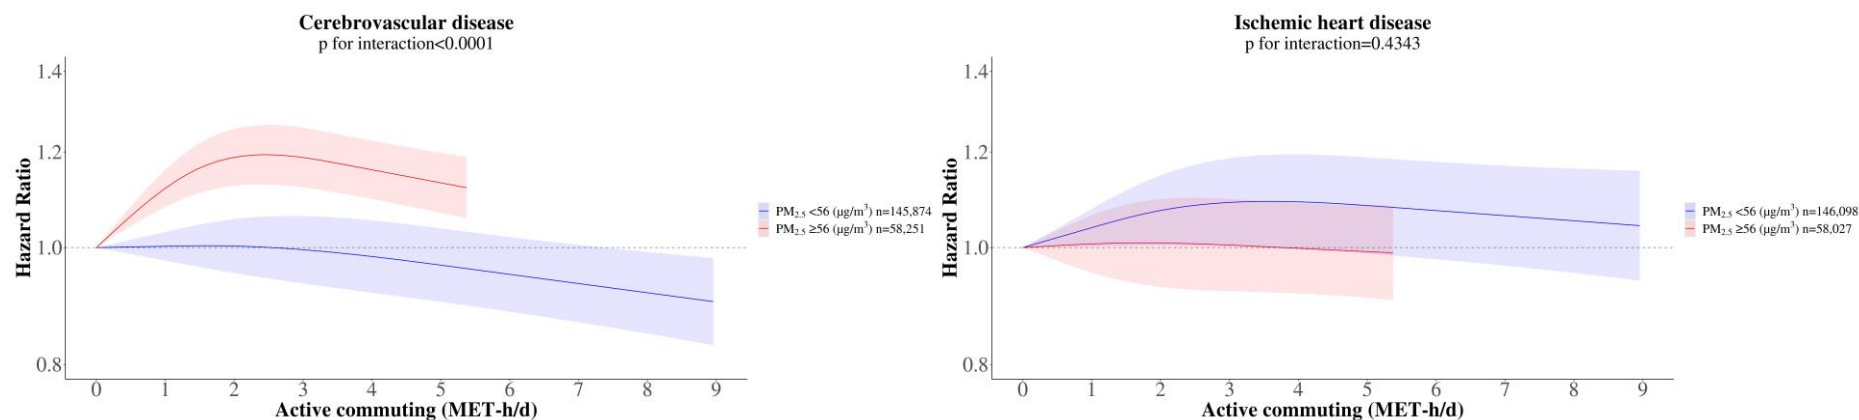

303

304 **Figure S9. Associations of physical activity from active commuting with cerebrovascular disease and ischemic heart disease among farmers stratified according to**  
 305 **the upper tertile of PM<sub>2.5</sub> concentration (n=204,125).**

306 MET, metabolic equivalent of task. Solid lines represent hazard ratios and the ribbons represent 95% confidence intervals from Cox proportional hazard models with  
 307 restricted cubic splines. Curves within the 95<sup>th</sup> percentile of active commuting level in each stratum were shown.

308 The models were adjusted for sex, age (years), education, household income, seasonal work pattern of farm, smoking status, alcohol consumption, consumption of fresh  
 309 vegetables, fresh fruits, and red meat (days per week), leisure sedentary time (hours per day), fuel types for cooking and heating in baseline house, cumulative exposure time  
 310 to solid fuels in the past three houses (years), cookstove ventilation in the baseline house, duration of living with a smoker (years), exposure to secondhand smoke  
 311 (hours/day), BMI (kg/m<sup>2</sup>), WHR, self-rated health status, prevalent hypertension and diabetes, family histories of heart disease and stroke, and the remaining part after  
 312 deducting the active commuting from the total physical activity (MET-h/d).

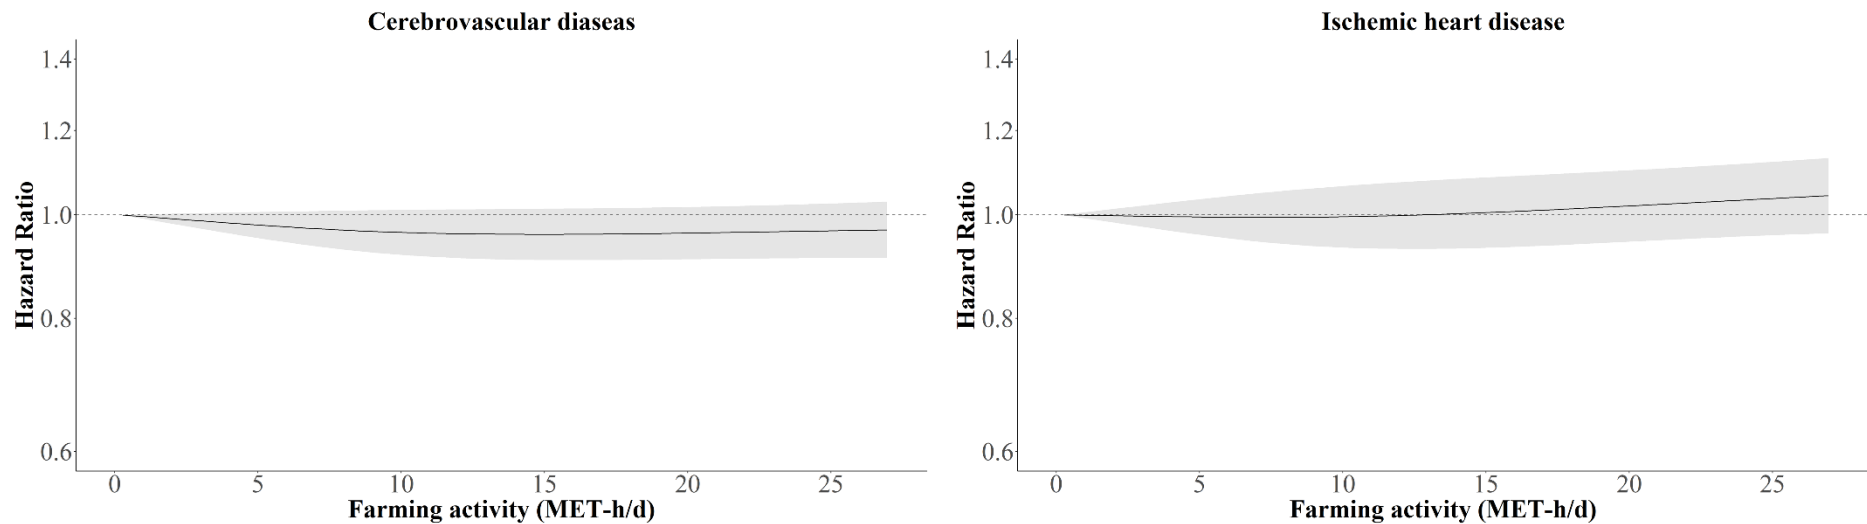

313

314 **Figure S10. Associations of physical activity from farming with cerebrovascular disease and ischemic heart disease among farmers (n=201,140).**

315 MET, metabolic equivalent of task. Solid lines represent hazard ratios and the ribbons represent 95% confidence intervals from Cox proportional hazard models with  
 316 restricted cubic splines. Curves within the 95<sup>th</sup> percentile of farming activity level were shown.

317 The models were adjusted for sex, age (years), education, household income, seasonal work pattern of farm, smoking status, alcohol consumption, consumption of fresh  
 318 vegetables, fresh fruits, and red meat (days per week), leisure sedentary time (hours per day), fuel types for cooking and heating in baseline house, cumulative exposure time  
 319 to solid fuels in the past three houses (years), cookstove ventilation in the baseline house, duration of living with a smoker (years), exposure to secondhand smoke  
 320 (hours/day), BMI (kg/m<sup>2</sup>), WHR, self-rated health status, prevalent hypertension and diabetes, family histories of heart disease and stroke, and the remaining part after  
 321 deducting the farming activity from the total physical activity (MET-h/d).

322

### Cerebrovascular disease

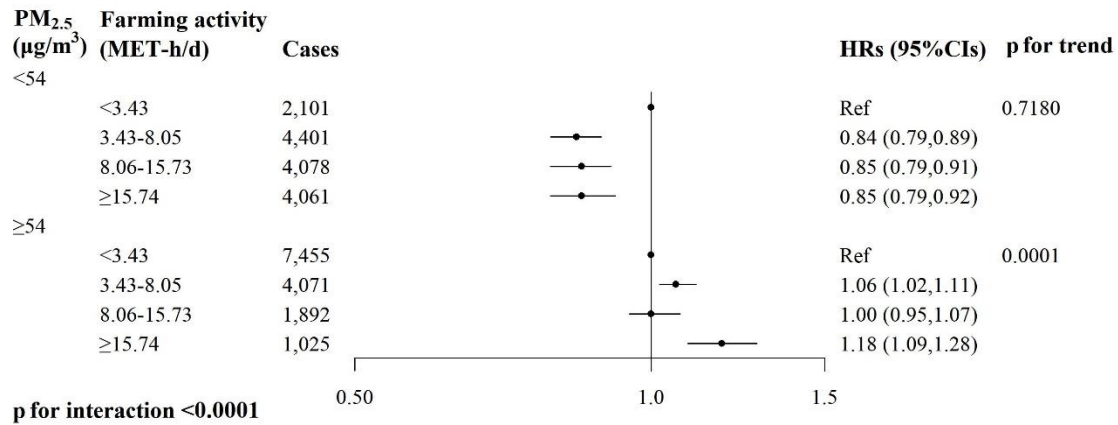

323

### Ischemic heart disease

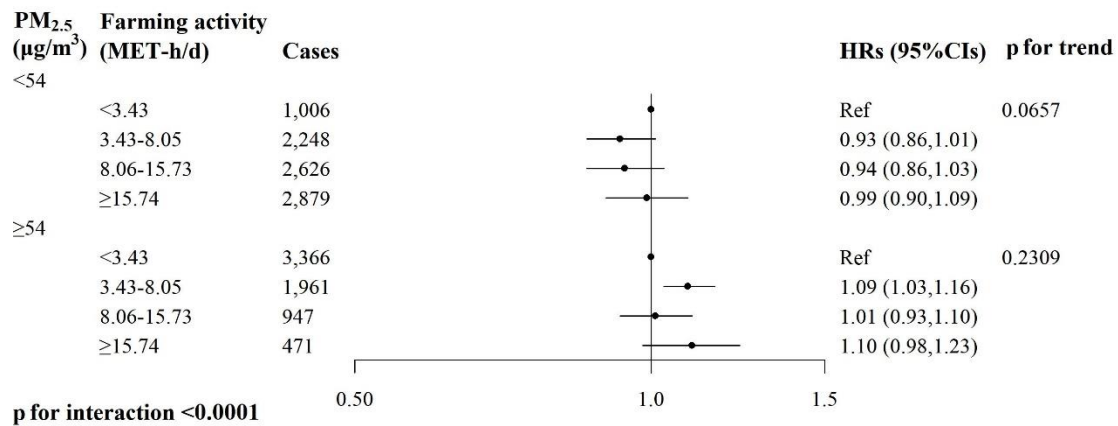

324

325 **Figure S11. Associations of farming activity level categories with cerebrovascular disease and**  
 326 **ischemic heart disease among farmers stratified according to the median of PM<sub>2.5</sub> concentration**  
 327 **(n=201,140).**

328 MET, metabolic equivalent of task.

329 The models were adjusted for sex, age (years), education, household income, seasonal work pattern of  
 330 farm, smoking status, alcohol consumption, consumption of fresh vegetables, fresh fruits, and red meat  
 331 (days per week), leisure sedentary time (hours per day), fuel types for cooking and heating in baseline  
 332 house, cumulative exposure time to solid fuels in the past three houses (years), cookstove ventilation in  
 333 the baseline house, duration of living with a smoker (years), exposure to secondhand smoke  
 334 (hours/day), BMI (kg/m<sup>2</sup>), WHR, self-rated health status, prevalent hypertension and diabetes, family  
 335 histories of heart disease and stroke, and the remaining part after deducting the farming activity from  
 336 the total physical activity (MET-h/d).

337

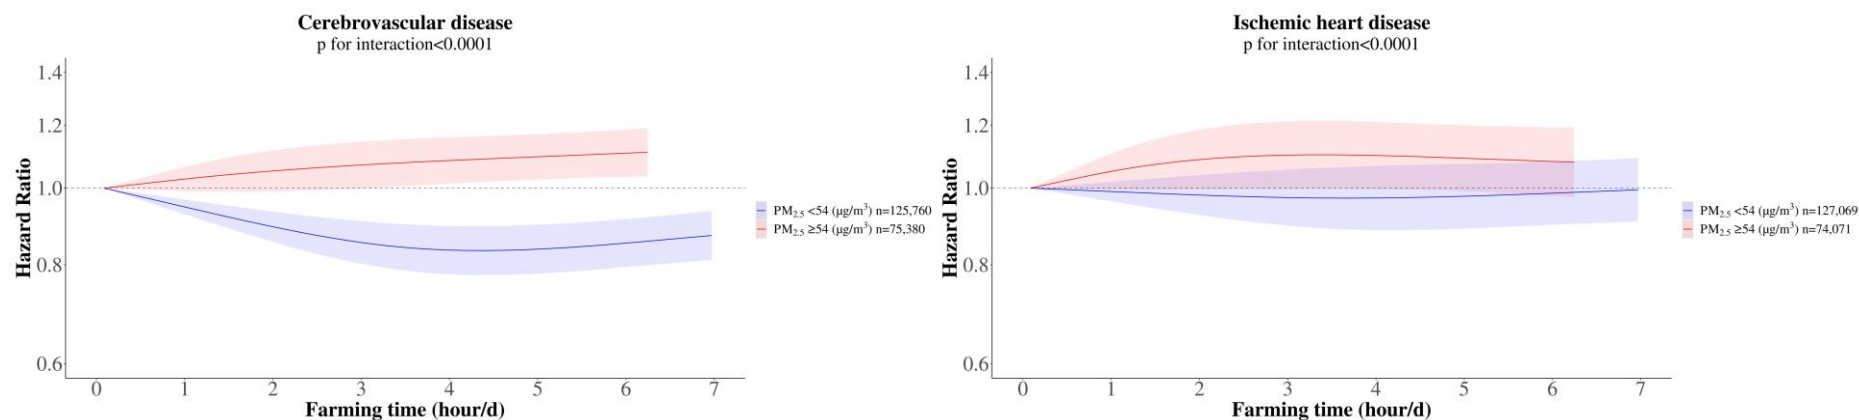

338

339 **Figure S12. Associations of farming time with cerebrovascular disease and ischemic heart disease among farmers stratified according to the median of PM<sub>2.5</sub>**  
 340 **concentration (n=201,140).**

341 MET, metabolic equivalent of task. Solid lines represent hazard ratios and the ribbons represent 95% confidence intervals from Cox proportional hazard models with  
 342 restricted cubic splines. Curves within the 95<sup>th</sup> percentile of farming time in each stratum were shown.

343 The models were adjusted for sex, age (years), education, household income, seasonal work pattern of farm, smoking status, alcohol consumption, consumption of fresh  
 344 vegetables, fresh fruits, and red meat (days per week), leisure sedentary time (hours per day), fuel types for cooking and heating in baseline house, cumulative exposure time  
 345 to solid fuels in the past three houses (years), cookstove ventilation in the baseline house, duration of living with a smoker (years), exposure to secondhand smoke  
 346 (hours/day), BMI (kg/m<sup>2</sup>), WHR, self-rated health status, prevalent hypertension and diabetes, family histories of heart disease and stroke, and the remaining part after  
 347 deducting the farming activity from the total physical activity (MET-h/d).

348



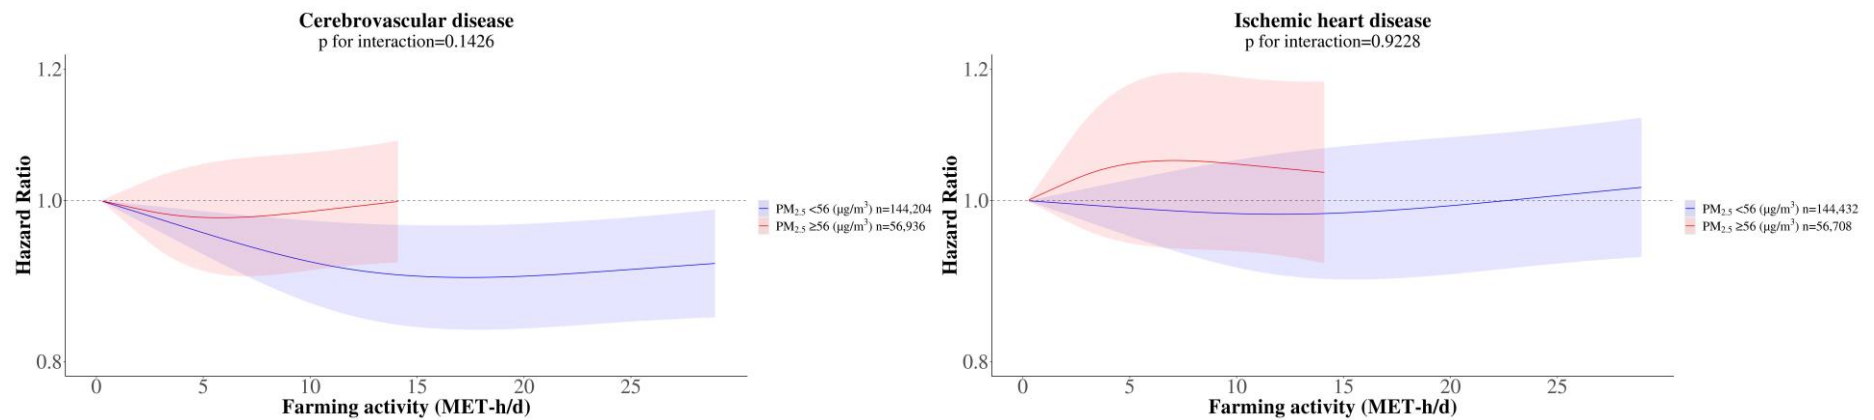

349

350 **Figure S13. Associations of physical activity from farming with cerebrovascular disease and ischemic heart disease among farmers stratified according to the upper**  
 351 **tertile of PM<sub>2.5</sub> concentration (n=201,140).**

352 MET, metabolic equivalent of task. Solid lines represent hazard ratios and the ribbons represent 95% confidence intervals from Cox proportional hazard models with  
 353 restricted cubic splines. Curves within the 95<sup>th</sup> percentile of farming activity level in each stratum were shown.

354 The models were adjusted for sex, age (years), education, household income, seasonal work pattern of farm, smoking status, alcohol consumption, consumption of fresh  
 355 vegetables, fresh fruits, and red meat (days per week), leisure sedentary time (hours per day), fuel types for cooking and heating in baseline house, cumulative exposure time  
 356 to solid fuels in the past three houses (years), cookstove ventilation in the baseline house, duration of living with a smoker (years), exposure to secondhand smoke  
 357 (hours/day), BMI (kg/m<sup>2</sup>), WHR, self-rated health status, prevalent hypertension and diabetes, family histories of heart disease and stroke, and the remaining part after  
 358 deducting the farming activity from the total physical activity (MET-h/d).
